# Supplementary material
Source: PubMed Central journal article supplement (PMC3013046)
Supplement: supp_M110.184176_jbc.M110.184176-1.pdf [file supp_M110.184176_jbc.M110.184176-1.pdf]

## Supplemental Data

**Table S1. Primers used for cloning and mutagenesis.**

| <b>Primer Name</b>       | <b>Primer Sequence</b>                 |
|--------------------------|----------------------------------------|
| Fra2( $\Delta$ 1-35) FOR | 5'-GACACTATCATATGCCCCGTTACTGAAC-3'     |
| Fra2( $\Delta$ 1-35) REV | 5'-GCTTGTCGACGGTACCCCTCATACCAC-3'      |
| Fra2 C66S FOR            | 5'-GGATCTTTCGTACGGTTCTGGTCAGTCGTTTG-3' |
| Fra2 C66S REV            | 5'-CAAACGACTGACCAGAACCGTACGAAAGATCC-3' |
| Fra2 C107S FOR           | 5'-CATGCCTTTAGCAGCAAGTGCTACAC-3'       |
| Fra2 C107S REV           | 5'-GTGTAGCACTTGCTGCTAAAGGCATG-3'       |
| Fra2 C109S FOR           | 5'-GTGCTGCAAGAGCTACACTGAGG-3'          |
| Fra2 C109S REV           | 5'-CCTCAGTGTAGCTCTTGCAGCAC-3'          |
| Fra2 H56A FOR            | 5'-CCGCAAGTTTACGCTATCATTGTGACG-3'      |
| Fra2 H56A REV            | 5'-CGTCACAATGATAGCGTAAACTTGCGG-3'      |
| Fra2 H103A FOR           | 5'-GCTGCAGGAGATTGCTGCCTTTAGCTGC-3'     |
| Fra2 H103A REV           | 5'-GCAGCTAAAGGCAGCAATCTCCTGCAGC-3'     |
| Fra2 H103C FOR           | 5'-GCAGGAGATTTGTGCCTTTAGCTG-3'         |
| Fra2 H103C REV           | 5'-CAGCTAAAGGCACAAATCTCCTGC-3'         |

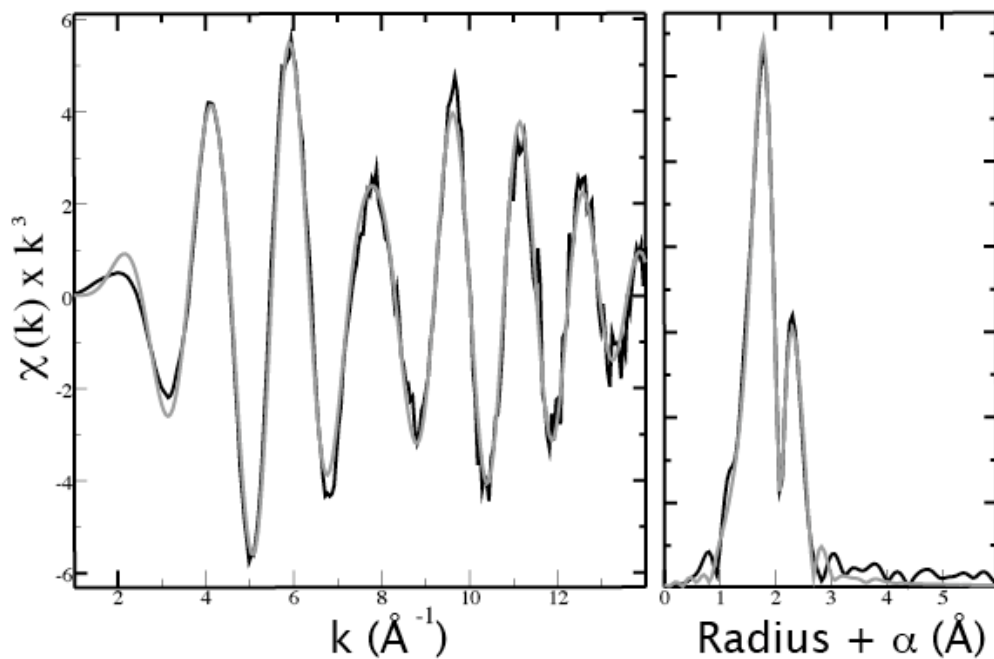

**Figure S1. Best 4-shell fit to the Fra2(H103A)-Grx3 heterodimer.** Fit details are found in Table 1, fit D. Gray line = fit, black line = unfiltered data.

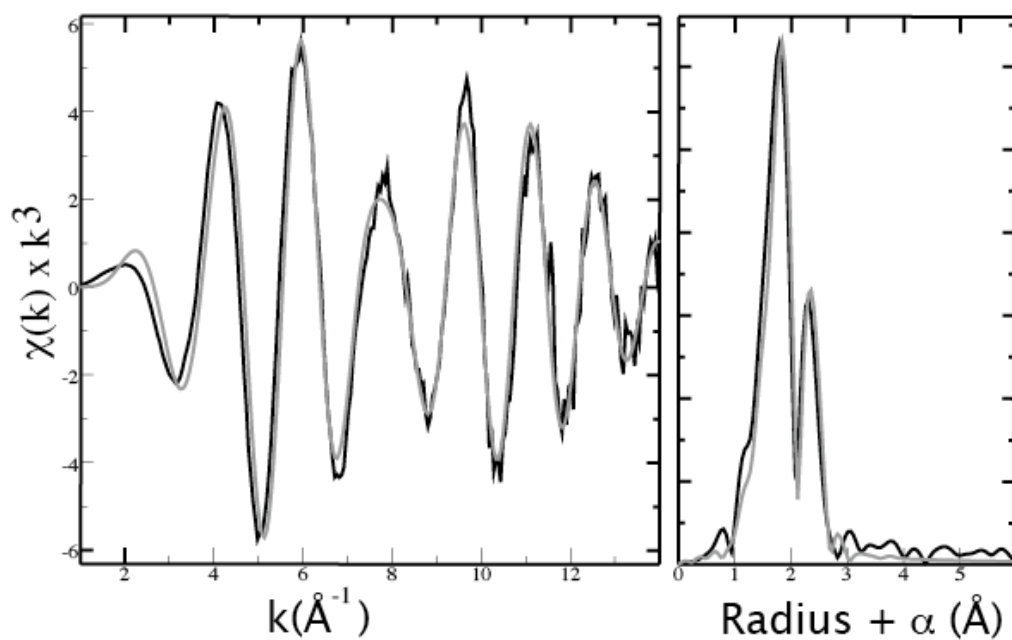

**Figure S2. Best 2-shell fit to the Fra2(H103A)-Grx3 heterodimer.** Fit details are found in Table 1, fit B. Gray line = fit, black line = unfiltered data.

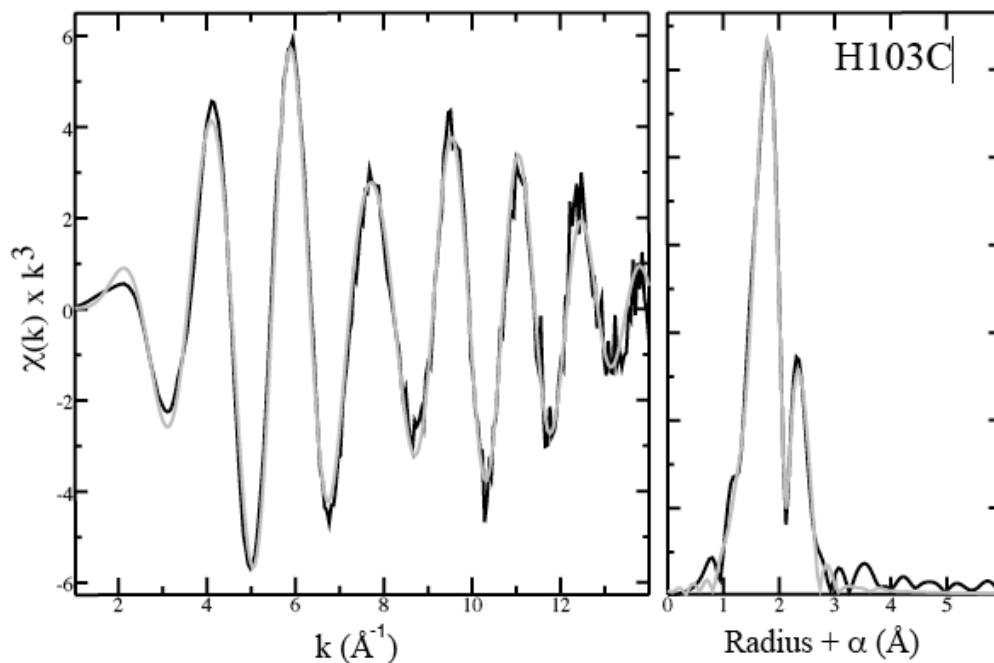

**Figure S3. Best 4-shell fit to the Fra2(H103C)-Grx3 heterodimer.** Fit details are found in Table 1, fit H. Gray line = fit, black line = unfiltered data.

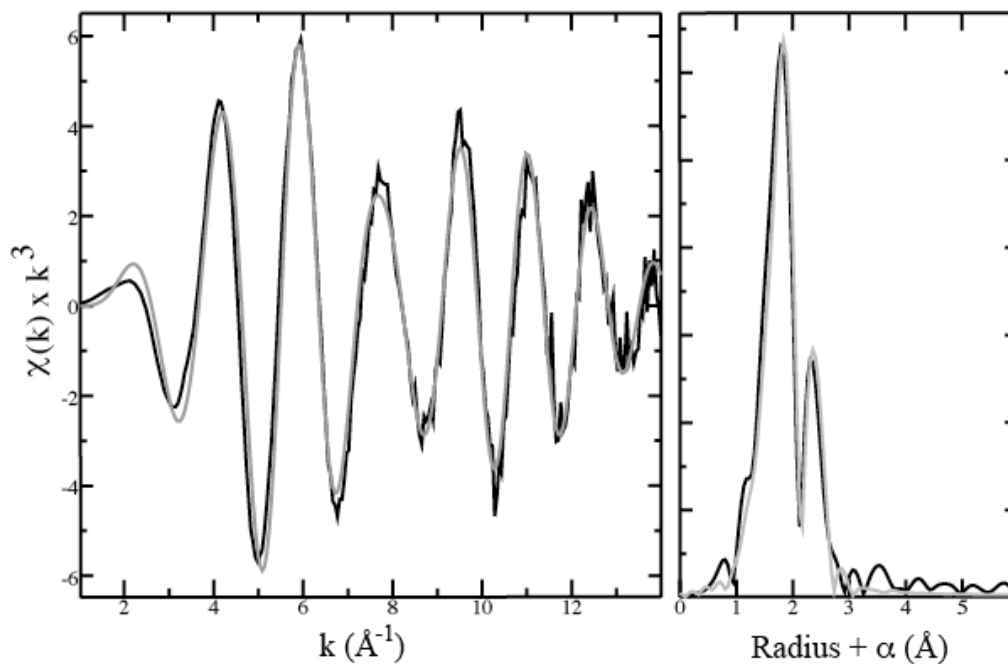

**Figure S4. Best 2-shell fit to the Fra2(H103C)-Grx3 heterodimer.** Fit details are found in Table 1, fit F. Gray line = fit, black line = unfiltered data.

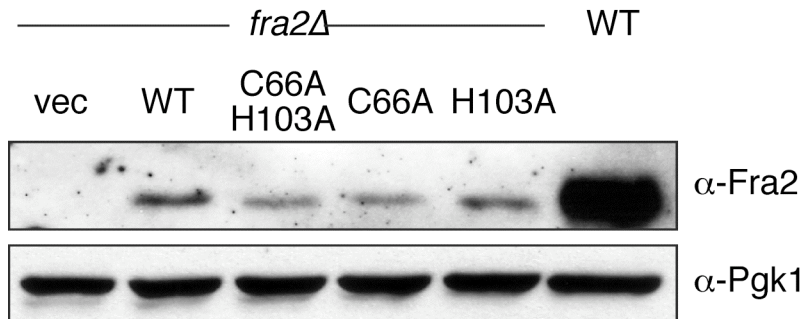

**Figure S5. SDS-PAGE analysis of yeast strains used for the S1 nuclease protection assay (see Fig. 6) immunoblotted with  $\alpha$ -Fra2 and  $\alpha$ -Pgk1 (loading control) antibodies.** Plasmid-encoded WT and mutant Fra2 is expressed at lower levels than the native genome-encoded Fra2, however plasmid-encoded WT Fra2 is able to fully complement Fe-dependent inhibition of Aft1 (see Fig. 6, lane 3).
